# Supplementary material for: A qualitative study to explore the attitudes of women and obstetricians towards caesarean delivery in rural Bangladesh
Source: Springer Nature journal article supplement (doi:10.1186/s12884-018-1993-9), 2018-09-12
Supplement: MOESM1 [file 16117606]

## Interview guideline for IDI & FGD

### Socio demography of study women

IDI number:

Date:

Site/Place:

Time: Starts: \_\_\_\_:\_\_\_\_ End: \_\_\_\_:\_\_\_\_

| SN | QUESTIONS                                    | RESPONSE            | NOTES/REMARKS |
|----|----------------------------------------------|---------------------|---------------|
| 1  | Name                                         |                     |               |
| 2  | Age                                          |                     |               |
| 3  | Religion                                     |                     |               |
| 4  | Education                                    |                     |               |
| 5  | Residence(village name)                      |                     |               |
| 6  | Occupation                                   |                     |               |
| 7  | Husband occupation                           |                     |               |
| 8  | Husband education level                      |                     |               |
| 9  | House hold head                              |                     |               |
| 10 | Family Income                                | Self:<br>Household: |               |
| 11 | How many antenatal check up taken            |                     |               |
| 12 | From whom ANC taken                          |                     |               |
| 13 | parity                                       |                     |               |
| 14 | Previous delivery history (mode of delivery) |                     |               |
| 15 | Cost for C-section (formal & informal)       |                     |               |
| 16 | Hospital where recent C-section done         |                     |               |

**RQ: 2 To document the attitude and experience related to C-Section among the women in post- operative period both in public& private hospital of rural Matlab.**

- Was the decision to have a C/S yours or someone else?(Probe for doctors or any 3<sup>rd</sup> part interference)
- How do you feel after having C/S?(it will cover both physical economic,social view,sexual practice)
- What are the obstacles you face to come here?
- What was your plan about delivery?(mode,savings,site if it is c/s)
- why the doctors or mid wives prescribed you for c/s?
- What did you know about c/s before coming here?
- What type of arguments you had with the attending physicians and your family member on taking final decision for this c/s?
- From this surgery who benefitted mostly you or your baby? Why?
- After recovery have there been any change on your perception about c/s?
- Will you advise this surgery for your near one?
- When and why you will do so?
- If you will be pregnant in future, what mode you choose for you to deliver? why?

**RQ1: To understand the perception regarding Cesarean section among pregnant women attend in the public and private hospital in Matlab.**

- What do you know about c/s?
- Where can a women get this service in your area?( probe about having any fear on facility related to c/s,preferred site for c/s)
- When a women need to do C/S? (probe about doctors decision either in favour or disfavor of it?)
- Why they need to do it?
- From where you get to know about it?( ask about from ANC visit)
- do you know someone among your neighborhood or relatives, , who need to went for C/S?
- Why they are advised to do so?
- How those women and her family accept that decision?
- What may be the experience of women who have had CS? (physical.family tasks, risk on sexual practice in relation to )
- How are they treated by their family and community after the CS?
  - acceptance by the family and community
  - make her guilty
  - certain behavior during pregnancy is considered to have negative effect,perceived by the family members.
- In your understanding, what are the advantages of CS?
- In your understanding, what are the disadvantages of CS?
- If you will be advised to do so in your delivery what will you do?
- Why you will do so? Probe is there anyone other than her selves who play potential influence on decision making )
- With same cost which mode of delivery you choose?
- Do you know someone who has done c/s just for her convenience without any indication?
- If yes, why women are doing so?

## Socio demography of doctor participants

**IDI number:**

**Date:**

**Site/Place:**

**Time: Starts:** \_\_\_\_:\_\_\_\_

**End:** \_\_\_\_:\_\_\_\_

| SN | Questions                       | Response | Remarks |
|----|---------------------------------|----------|---------|
| 1  | Age                             |          |         |
| 2  | Sex                             |          |         |
| 3  | Employment status               |          |         |
| 4  | Post graduation degree/training | Year     | subj    |
| 5  | Working experience              |          |         |
| 6  | Monthly salary                  |          |         |

**RQ 3: To explore the knowledge and attitude on Cesarean section among doctors of public and private hospitals in that study area.**

- In which cases you need to choose C/S as mode of delivery in your practice?
- Can you share with me what does you mean by elective c/s?
- What would be your response towards women request for c/s? (probe either he is also getting these type of response from his respondents)
- What are the advantages and disadvantages of c/s in compare to c/s?
- What is the overall perception of c/s among your clients in this area?
- What type of difficulties do you face to motivate women for c/s?
- What are some of the factors that influence your decision to do a C/S? probe
  - Type of hospital
  - Availability of resources both surgeon, anaesthesits, nurses, instrument to monitor labour and so on
  - On call doctors
  - Media pressure (legal issue)
  - Client pressure( fear of litigation)
- If you consider the c/s rate now and 5years before is there any change in this area?
- if yes, what are the leading causes?
- Are you practicing both in public and private hospital?
- Is there any variation in c/s rate in public and private hospital? What may be possible causes in your experience?
